# Supplementary material for: Parental thermal conditions affect the brain activity response to alarm cue in larval zebrafish
Source: PeerJ. 2024 Oct 10;12:e18241. doi: 10.7717/peerj.18241 (PMC11471146; doi:10.7717/peerj.18241)
Supplement: Supplemental Information 3 — Supplementary Table 2: each row corresponds to an acquisition; “Run ID” refers to the order of fish measurements processing within one experimental date; “Cue” refers to the olfactory cue administered during the acquisition (control solution W, or alarm cue CAC); “F1” to “F20” are ΔF measurements in frames 1 to 20 [file peerj-12-18241-s003.xlsx]

## Sheet: Suppl. Table 1
Supplementary Table 1: Summary of experimental conditions experienced by the zebrafish parents, their offspring and water chemistry parameters measured throughout the experiment
Date (jj/mm/aaaa)	Time (hh:mm)	Parental exposure	Parental temp. (°C)	pH	NO3- (mg/L)	Offspring control temp. (°C)	Offspring treatment temp. (°C)	Notes
2023-12-03	17:00:00	control temp.	28					fish were added to the tank
2023-12-04	09:00:00	control temp.	27.7
2023-12-05	09:00:00	control temp.	27.6
2023-12-06	09:00:00	control temp.	27.5			28.1	30	fish bred multiple times, embryos were collected
2023-12-07	09:00:00	control temp.	27.5	7.91	15.6	28.1	30	fish bred, embryos were collected
2023-12-11	09:30:00	control temp.	27.6			27.9	30.3
2023-12-12	09:00:00	control temp.	27.9			28.1	30
2023-12-14	15:00:00	control temp.	27.5			27.7	29.9
2023-12-15	15:00:00	control temp.	27.9			28.2	30
2023-12-16	11:00:00	control temp.	27.8			28	30
2023-12-18	19:00:00	control temp.	27.8			28	30
2023-12-20	10:00:00	control temp.	27.8			28	30
2023-12-21	17:00:00	control temp.	27.4
2023-12-22	10:00:00	control temp.	27.7
2023-12-26	12:00:00	control temp.	27.9
2023-12-28	10:00:00	control temp.	27.7
2024-01-01	11:00:00	control temp.	27.6
2024-01-02	11:00:00	control temp.	27.8
2024-01-08	14:00:00	control temp.	27.6
2024-01-09	14:00:00	control temp.	27.9
2024-01-11	14:00:00	control temp.	28	7.78	16
2024-01-12	09:30:00	control temp.	27.9
2024-01-15	10:00:00	control temp.	27.5					breeding occurred
2024-01-16	10:00:00	control temp.	28
2024-01-17	10:00:00	control temp.	27.7
2024-01-18	10:00:00	elevated temp.	30	7.83	13.1			breeding occurred; temperature was then set to 30degrees for the thermal experiment
2024-01-19	10:00:00	elevated temp.	29.6					breeding occurred
2024-01-22	10:00:00	elevated temp.	30.1			28	30.1
2024-01-23	10:00:00	elevated temp.	29.9			28.3	30.1
2024-01-24	10:00:00	elevated temp.	29.9			28.4	30.1	breeding occurred
2024-01-25	14:00:00	elevated temp.	30	7.88	17.1	28	30
2024-01-26	09:00:00	elevated temp.	29.8			28	30
2024-01-29	09:00:00	elevated temp.	30	7.9	19.4	27.9	30
2024-01-30	09:00:00	elevated temp.	29.6			27.9	30
2024-01-31	10:00:00	elevated temp.	29.6			27.9	30.4
2024-02-01	09:00:00	elevated temp.	30.1			27.9	30.2
2024-02-02	09:00:00	elevated temp.	29.9			28.1	30.4
2024-02-05	10:00:00	elevated temp.	29.8			28.1	30
2024-02-06	10:00:00	elevated temp.	30.1			28	30
2024-02-07	10:00:00	elevated temp.	30	8.02	15.3	28.2	30.1
2024-02-08	10:00:00	elevated temp.	29.6			28.2	30.1
2024-02-09	10:00:00	elevated temp.	29.8			28.3	30.2
2024-02-12	10:00:00	elevated temp.	29.3			28.4	30.4
2024-02-13	10:00:00	elevated temp.	29.8			28	30

## Sheet: Suppl. Table 2
Supplementary Table 2: Summary of experimental conditions and telencephalon activity measurements performed on zebrafish larvae; each row corresponds to an acquisition; "Run ID" refers to the order of fish measurements processing within one experimental date; "Cue" refers to the olfactory cue administered during the acquisition (control solution W, or alarm cue CAC); "F1" to "F20" are ∆F measurem…
Ind. name	Run ID	Date of birth	Exp. date	Parents temp. (°C)	Offspring temp. (°C)	Cue	OB plane size (μm2)	Max ∆F	Max ∆F/F	time of Max ∆F (s)	Response duration (s)	F1	F2	F3	F4	F5	F6	F7	F8	F9	F10	F11	F12	F13	F14	F15	F16	F17	F18	F19	F20
N+28-2-36	1	2023-12-06	2023-12-14	28	28	W	11623.6	7.047	0.0725978	6.6	6.6	0	-1.279	2.32	7.047	4.24	0.76	-2.59	-5.496	-8.116	-11.258	-12.741	-16.024	-18.331	-18.816	-19.886	-25.029	-26.071	-28.659	-29.807	-30.802
N+28-2-36	1	2023-12-06	2023-12-14	28	28	CAC	11623.6	40.166	0.332112	9.9	26.4	0	1.461	17.423	33.904	38.637	40.166	37.681	37.229	36.689	28.339	24.729	25.035	22.139	15.887	8.367	5.553	4.568	-1.432	-4.88	-8.923
N+28-2-37	3	2023-12-06	2023-12-14	28	28	W	11062.4	8.857	0.13718	13.2	13.2	0	-2.088	-1.338	-0.398	1.913	3.274	6.988	8.857	7.877	5.588	3.471	0.255	-2.289	-4.967	-5.748	-6.896	-9.059	-11.333	-13.159	-13.431
N+28-2-37	3	2023-12-06	2023-12-14	28	28	CAC	11062.4	11	0.1467	18.15	24.75	0	2.833	3.238	2.217	0.685	0.456	1.745	5.718	9.02	9.699	11	9.338	9.686	6.592	3.163	0.163	-1.351	-3.509	-5.701
N+28-2-39	5	2023-12-06	2023-12-14	28	28	W	11141.7	6.416	0.0939206	9.9	11.55	0	-0.182	-0.023	3.818	5.739	6.416	5.065	2.472	1.325	0.991	-1.18	-3.928	-6.414	-6.637	-7.926	-9.237	-11.104	-11.763	-12.301	-11.547
N+28-2-39	5	2023-12-06	2023-12-14	28	28	CAC	11141.7	22.895	0.270924	8.25	14.85	0	0.837	14.006	20.804	22.895	21.417	17.804	13.566	8.79	4.905	-0.197	-2.026	-5.619	-6.977	-8.624	-10.03	-13.874	-17.163	-19.001	-19.149
N+28-2-40	7	2023-12-06	2023-12-14	28	28	W	12693.2	5.584	0.118135	8.25	21.45	0	-2.787	-1.21	4.08	5.584	4.827	2.767	2.456	2.451	2.017	0.401	1.512	1.243	0.838	-1.1	1.662	1.332	-0.408	-2.919	-4.936
N+28-2-40	7	2023-12-06	2023-12-14	28	28	CAC	12693.2	13.896	0.274603	6.6	21.45	0	5.852	13.544	13.896	11.719	11.986	12.663	10.319	8.237	6.46	3.895	1.315	2.086	1.526	-1.011	-2.845	-3.46	-3.264	-2.54	-2.3
N+28-2-45	5	2023-12-07	2023-12-15	28	28	W	12782.4	0	0	1.65	0	0	-1.764	-2.46	-3.707	-4.681	-5.42	-6.373	-6.774	-6.911	-7.622	-8.157	-8.86	-9.375	-9.732	-10.504	-10.963	-11.146	-11.256	-11.205	-11.165
N+28-2-45	5	2023-12-07	2023-12-15	28	28	CAC	12782.4	4.301	0.154075	9.9	18.15	0	0.487	1.514	1.58	2.739	4.301	3.867	2.395	2.362	2.685	1.281	0.537	-0.734	-1.986	-2.496	-3.503	-3.88	-3.785	-4.552
N+28-2-50	7	2023-12-07	2023-12-15	28	28	W	8681.91	11.392	0.151316	8.25	13.2	0	-0.155	4.074	10.189	11.392	11.292	8.081	2.765	1.105	1.314	-1.89	-3.474	-2.975	-3.76	-3.398	-6.439	-10.755	-14.45	-17.049	-16.318
N+28-2-50	7	2023-12-07	2023-12-15	28	28	CAC	8681.91	22.271	0.269997	9.9	19.8	0	3.678	8.761	20.819	21.896	22.271	19.744	17.58	12.56	8.79	6.231	5.524	0.939	-2.623	-7.333	-11.728	-13.068	-15.683	-12.736
N+28-2-54	5	2023-12-08	2023-12-16	28	28	W	11407.7	0.738	0.0124565	11.55	1.65	0	-3	-26.578	-7.721	-3.819	-0.831	0.738	-0.71	-1.7	-1.29	-3.5	-4.891	-6.673	-7.523	-8.206	-9.462	-10.548	-9.54	-10.195	-11.28
N+28-2-54	5	2023-12-08	2023-12-16	28	28	CAC	11407.7	21.226	0.361558	8.25	19.8	0	4.868	14.993	19.901	21.226	20.524	17.364	15.093	11.849	9.004	5.203	3.255	1.222	-0.664	-0.59	-2.151	-2.572	-3.444	-3.524
N+28-2-57	8	2023-12-08	2023-12-16	28	28	W	11865.6	0	0	1.65	0	0	-0.515	-0.265	-0.714	-0.429	-0.342	-1.361	-2.35	-3.307	-4.202	-5.191	-6.206	-6.853	-7.277	-7.572	-7.782	-7.805	-7.179	-6.58	-6.004
N+28-2-57	8	2023-12-08	2023-12-16	28	28	CAC	11865.6	19.308	0.600653	6.6	21.45	0	0.717	12.665	19.308	17.802	14.204	10.536	7.925	6.112	4.347	3.046	2.297	1.845	0.883	-0.361	-0.589	-1.266	-1.881	-2.518	-3.109
N+30-1-38	4	2023-12-06	2023-12-14	28	30	W	10562.9	6.139	0.192784	9.9	19.8	0	-0.341	1.625	2.624	5.026	6.139	5.167	3.416	1.608	0.691	1.897	1.439	0.215	0.093	-1.031	-2.079	-3.11	-3.331	-4.406	-4.019
N+30-1-38	4	2023-12-06	2023-12-14	28	30	CAC	10562.9	13.521	0.411198	13.2	31.35	0	1.089	3.248	4.19	4.49	6.3	12.23	13.521	11.875	9.817	12.558	11.67	11.609	11.009	9.267	7.757	8.094	7.775	6.883	4.357
N+30-1-42	6	2023-12-06	2023-12-14	28	30	W	13434.8	0	0	1.65	0	0	-8.755	-13.079	-10.876	-4.545	-3.504	-4.384	-6.064	-6.31	-6.23	-5.783	-2.657	-5.307	-5.584	-9.892	-14.653	-19.125	-21.53	-23.907	-25.671
N+30-1-42	6	2023-12-06	2023-12-14	28	30	CAC	13434.8	14.853	0.15752	8.25	14.85	0	7.382	8.506	12.062	14.853	14.734	11.465	6.992	6.869	2.65	-2.622	-2.569	-4.378	-9.065	-13.306	-14.665	-16.897	-11.052
N+30-1-44	3	2023-12-07	2023-12-15	28	30	W	10395.6	6.524	0.121785	11.55	9.9	0	-1.325	-2.882	-1.967	4.754	6.316	6.524	4.533	3.403	1.046	-1.689	-3.627	-4.367	-5.316	-6.734	-8.567	-10.115	-10.712	-11.116	-11.739
N+30-1-44	3	2023-12-07	2023-12-15	28	30	CAC	10395.6	19.949	0.341184	14.85	29.7	0	1.134	8.518	13.402	15.825	18.192	18.513	18.879	19.949	19.269	18.146	14.155	11.879	8.119	6.58	4.963	3.234	2.059	1.153
N+30-1-46	6	2023-12-07	2023-12-15	28	30	W	9498.76	7.872	0.0764027	13.2	13.2	0	-6.028	-7.113	-7.015	-1.437	4.126	7.403	7.872	5.094	3.325	1.558	2.543	0.936	-0.804	-4.753	-11.397	-17.937	-23.254	-23.787	-25.097
N+30-1-46	6	2023-12-07	2023-12-15	28	30	CAC	9498.76	43.409	0.525215	9.9	29.7	0	13.49	26.092	36.88	41.794	43.409	39.31	35.214	33.344	30.071	29.947	25.902	21.838	18.166	15.593	13.477	13.429	11.164	10.294
N+30-1-55	6	2023-12-08	2023-12-16	28	30	W	12097.6	0	0	1.65	0	0	-4.145	-7.419	-10.774	-13.442	-14.811	-16.742	-17.379	-17.113	-17.821	-18.654	-17.823	-19.606	-21.458	-21.629	-22.711	-23.226	-24.075	-25.389	-24.737
N+30-1-55	6	2023-12-08	2023-12-16	28	30	CAC	12097.6	8.572	0.137235	6.6	19.8	0	3.281	6.816	8.572	8.348	7.855	6.97	6.003	4.063	4.2	3.966	3.024	1.641	-0.48	-1.633	-2.334	-4.789	-5.857	-8.668
N+30-1-58	9	2023-12-08	2023-12-16	28	30	W	10555.1	0	0	1.65	0	0	-2.09	-2.574	-4.052	-5.215	-7.123	-7.726	-9.16	-9.893	-10.924	-11.575	-11.994	-12.076	-12.43	-12.567	-13.335	-13.124	-12.758	-13.913	-15.448
N+30-1-58	9	2023-12-08	2023-12-16	28	30	CAC	10555.1	10.306	0.251796	8.25	19.8	0	4.334	8.947	9.864	10.306	8.991	6.821	5.321	4.373	2.991	2.5	1.032	0.744	-0.783	-1.821	-1.131	-1.305
N+30-1-60	1	2024-01-18	2024-01-26	28	30	W	10451.9	3.247	0.108755	6.6	13.2	0	0.647	3.002	3.247	2.502	1.694	-0.238	0.618	0.275	0.476	-0.17	-1.138	-2.126	-2.946	-3.312	-3.083	-3.029	-3.861	-4.137
N+30-1-60	1	2024-01-18	2024-01-26	28	30	CAC	10451.9	9.574	0.327126	6.6	23.1	0	3.665	8.516	9.574	9.56	9.104	8.148	8.024	7.591	6.794	6.397	5.987	4.125	2.818	0.732	-0.71	-1.966	-3.587	-4.259
N+30-1-61	2	2024-01-18	2024-01-26	28	30	W	10604	0	0	1.65	0	0	-1.991	-3.882	-3.581	-2.133	-2.239	-3.249	-4.913	-7.865	-9.154	-8.996	-8.238	-9.156	-9.35	-11.068	-12.467	-12.198	-11.702	-11.689	-12.59
N+30-1-61	2	2024-01-18	2024-01-26	28	30	CAC	10604	15.655	0.311635	6.6	29.7	0	8.777	14.879	15.655	14.924	14.059	12.137	12.224	11.825	9.958	9.876	7.36	4.56	2.716	2.599	3.393	2.725	1.044	0.042	-1.681
N+30-1-64	3	2024-01-18	2024-01-26	28	30	W	10922	2.16	0.0346254	14.85	8.25	0	-1.742	-2.359	-1.824	-0.581	-0.137	0.384	1.534	2.16	1.414	0.007	-1.045	-2.079	-2.011	-3.481	-4.314	-5.289	-6.431	-7.842	-9.963
N+30-1-64	3	2024-01-18	2024-01-26	28	30	CAC	10922	15.151	0.203249	9.9	23.1	0	2.441	8.167	12.768	15.142	15.151	14.78	15.033	13.363	13.383	11.639	9.288	7.643	4.228	0.921	-1.279	-4.175	-6.226	-8.395	-8.717
N+30-1-66	5	2024-01-18	2024-01-26	28	30	W	9370.16	5.228	0.146706	11.55	16.5	0	-0.305	1.07	2.166	3.024	4.205	5.228	5.087	4.726	3.618	2.997	1.845	-0.742	-2.229	-3.362	-4.448	-5.008	-5.29	-6.053	-6.22
N+30-1-66	5	2024-01-18	2024-01-26	28	30	CAC	9370.16	21.169	0.59161	9.9	26.4	0	0.794	10.032	15.697	19.761	21.169	20.701	19.105	17.093	14.092	12.136	9.361	7.591	5.007	2.769	1.158	0.009	-1.01	-2.365	-3.904
N+CO-79	5	2024-01-24	2024-02-01	30	28	W	12406.3	10.385	0.438334	16.5	29.7	0	0.702	4.768	8.73	9.329	9.945	9.936	10.018	10.182	10.385	9.286	7.961	6.773	4.712	2.275	1.106	1.141	1.393	0.476	-0.377
N+CO-79	5	2024-01-24	2024-02-01	30	28	CAC	12406.3	15.564	0.527897	6.6	19.8	0	6.706	12.352	15.564	15.078	13.886	12.735	10.132	6.969	6.12	3.959	2.271	0.167	-1.542	-2.483	-2.992	-3.468	-4.174	-4.818	-5.016
N+CO-80	6	2024-01-24	2024-02-01	30	28	W	10363.3	1.225	0.0281015	4.95	4.95	0	-1.457	1.225	0.331	-0.769	-0.889	-2.64	-4.269	-3.688	0.056	-2.325	-5.816	-7.298	-7.942	-5.881	-5.641	-4.948	-5.315	-5.281	-5.517
N+CO-80	6	2024-01-24	2024-02-01	30	28	CAC	10363.3	7.356	0.169123	8.25	16.5	0	0.875	4.064	6.573	7.356	6.246	6.161	6.887	6.484	3.393	0.673	-1.625	-3.393	-5.353	-6.338	-6.8	-7.45	-7.881	-7.62	-7.52
N+CO-87	8	2024-01-25	2024-02-02	30	28	W	10088.9	1.899	0.053104	4.95	3.3	0	-1.55	1.899	1.25	-0.594	-2.434	-3.919	-4.939	-5.214	-5.067	-5.484	-5.621	-4.139	-4.351	-5.05	-6.074	-7.952	-9.192	-9.618	-10.068
N+CO-87	8	2024-01-25	2024-02-02	30	28	CAC	10088.9	13.538	0.371393	6.6	18.15	0	5.025	12.198	13.538	12.286	9.939	9.085	7.332	5.183	3.448	1.378	0.079	-1.218	-2.807	-3.337	-4.097	-5.322	-6.193	-6.887	-8.074
N+CO-88	9	2024-01-25	2024-02-02	30	28	W	9159.22	0	0	1.65	0	0	-1.418	-2.832	-4.369	-5.036	-5.004	-5.474	-6.03	-6.743	-7.564	-8.059	-8.764	-9.01	-9.132	-9.516	-9.894	-9.821	-10.118	-10.485	-10.359
N+CO-88	9	2024-01-25	2024-02-02	30	28	CAC	9159.22	26.635	0.894212	6.6	26.4	0	6.851	23.659	26.635	24.915	21.465	17.837	14.973	12.858	10.762	8.561	6.693	4.927	3.677	2.856	1.738	0.631	-0.403	-1.039	-0.47
N+CO-91	6	2024-01-31	2024-02-08	30	28	W	10664.8	0	0	1.65	0	0	-1.038	-2.102	-3.259	-3.843	-4.11	-4.951	-5.465	-6.228	-6.927	-6.926	-6.943	-6.373	-6.248	-6.374	-6.519	-6.377	-6.956	-7.549	-7.533
N+CO-91	6	2024-01-31	2024-02-08	30	28	CAC	10664.8	11.798	0.566884	4.95	28.05	0	9.725	11.798	11.572	11.336	11.167	10.302	9.727	9.005	8.543	7.344	6.114	5.488	5.003	4.592	4.31	3.899	4.271
N+CO-92	7	2024-01-31	2024-02-08	30	28	W	12329.7	0	0	1.65	0	0	-2.004	-3.433	-4.277	-5.173	-5.771	-6.251	-6.567	-6.748	-6.465	-6.918	-7.569	-7.969	-8.346	-8.645	-8.592	-8.478	-8.584	-8.521	-8.797
N+CO-92	7	2024-01-31	2024-02-08	30	28	CAC	12329.7	9.508	0.415759	8.25	24.75	0	2.39	6.046	8.629	9.508	8.97	8.656	8.338	6.936	6.068	4.95	3.935	2.759	1.787	1.134	0.43	-0.531	-0.893	-1.437	-1.259
N+CO-94	8	2024-01-31	2024-02-08	30	28	W	10264.4	0	0	1.65	0	0	-0.945	-1.811	-1.641	-1.723	-2.05	-2.464	-3.344	-4.309	-3.882	-4.041	-4.982	-5.535	-6.425	-7.302	-8.499	-9.161	-9.248	-9.864	-9.239
N+CO-94	8	2024-01-31	2024-02-08	30	28	CAC	10264.4	19.753	0.459041	6.6	18.15	0	10.338	18.62	19.753	16.77	14.187	11.965	9.038	5.575	4.103	2.66	0.32	-1.068	-1.647	-2.954	-4.212	-6.131	-7.785	-9.292	-10.785
N+CO-96	10	2024-01-31	2024-02-08	30	28	W	10773.7	3.093	0.0425851	4.95	4.95	0	0.809	3.093	2.123	-1.464	-4.446	-3.436	-5.46	-5.646	-6.926	-7.85	-7.026	-8.551	-8.335	-8.975	-10.86	-12.824	-13.031	-13.386	-15.479
N+CO-96	10	2024-01-31	2024-02-08	30	28	CAC	10773.7	33.574	0.540949	8.25	31.35	0	4.987	18.496	31.042	33.574	32.359	28.568	26.997	24.335	22.687	18.931	16.04	13.916	11.52	9.079	7.923	6.423	4.994	3.188	2.703
N+CO-102	10	2024-02-01	2024-02-09	30	28	W	11428.2	0.978	0.0179819	3.3	3.3	0	0.978	0.549	-2.375	-3.888	-4.247	-3.53	-3.398	-4.476	-5.462	-5.002	-5.229	-7.013	-8.394	-10.422	-11.699	-12.03	-11.467	-11.561	-11.158
N+CO-102	10	2024-02-01	2024-02-09	30	28	CAC	11428.2	23.23	0.520747	9.9	29.7	0	2.633	8.282	15.281	20.503	23.23	22.064	19.709	17.428	14.696	13.091	14.135	13.407	11.083	9.232	6.878	6.623	6.567	5.866
N+30-2-76	2	2024-01-24	2024-02-01	30	30	W	10880.6	2.546	0.107105	4.95	6.6	0	0.946	2.546	1.864	1.19	-0.249	-1.9	-2.525	-2.867	-3.561	-3.884	-3.871	-4.14	-4.333	-4.786	-4.91	-5.588	-5.994	-5.863	-5.197
N+30-2-76	2	2024-01-24	2024-02-01	30	30	CAC	10880.6	7.162	0.274711	4.95	9.9	0	6.163	7.162	5.175	3.293	1.634	0.463	-0.582	-1.737	-2.662	-3.59	-4.412	-5.014	-5.002	-5.508	-5.819	-6.52	-6.843	-7.369
N+30-2-81	7	2024-01-24	2024-02-01	30	30	W	11587.7	5.593	0.131938	6.6	11.55	0	0.192	3.662	5.593	5.261	3.598	1.545	0.573	-0.373	-0.092	-1.459	-1.186	-1.723	-1.732	-1.992	-3.217	-4.227	-5.541	-6.966	-6.524
N+30-2-81	7	2024-01-24	2024-02-01	30	30	CAC	11587.7	15.287	0.326603	4.95	13.2	0	12.869	15.287	13.142	9.583	6.212	4.019	3.04	0.726	-1.333	-2.834	-5.209	-7.039	-7.846	-8.573	-9.509	-10.835	-11.78	-12.152	-12.636
N+30-2-85	3	2024-01-25	2024-02-02	30	30	W	10376.2	2.304	0.0312195	11.55	8.25	0	-3.599	-2.914	0.55	0.967	1.26	2.304	0.749	-3.069	-5.995	-7.487	-8.737	-9.764	-10.925	-13.004	-14.698	-15.858	-17.535	-18.073	-18.646
N+30-2-85	3	2024-01-25	2024-02-02	30	30	CAC	10376.2	16.784	0.20711	8.25	16.5	0	4.215	13.495	15.85	16.784	14.692	13.254	12.262	8.087	5.793	2.489	-0.248	-1.537	-4.986	-8.474	-10.641	-12.868	-14.124	-16.578	-17.239
N+30-2-86	4	2024-01-25	2024-02-02	30	30	W	10422.2	0	0	1.65	0	0	-3.723	-4.699	-4.763	-4.704	-3.654	-3.785	-6.093	-8.578	-9.389	-11.332	-12.408	-12.823	-11.222	-12.14	-13.089	-13.545	-13.789	-15.126	-17.495
N+30-2-86	4	2024-01-25	2024-02-02	30	30	CAC	10422.2	28.5	0.57183	8.25	29.7	0	13.035	23.175	28.315	28.5	27.948	25.142	20.901	17.297	14.393	11.296	9.952	8.713	8.175	6.722	7.04	7.516	6.419	5.895
N+30-2-89	1	2024-01-31	2024-02-08	30	30	W	8743.09	0	0	1.65	0	0	-2.283	-3.097	-6.166	-7.994	-8.53	-9.418	-11.191	-13.15	-13.455	-14.087	-14.528	-15.241	-15.839	-15.47	-14.864	-14.972	-15.139	-15.622	-16.422
N+30-2-89	1	2024-01-31	2024-02-08	30	30	CAC	8743.09	19.248	0.495482	6.6	18.15	0	7.269	17.04	19.248	16.142	13.364	10.556	7.541	5.765	4.355	3.422	1.174	-1.343	-3.208	-3.143	-4.32	-5.377	-6.662	-7.383	-7.644
N+30-2-90	2	2024-01-31	2024-02-08	30	30	W	12153.9	0	0	1.65	0	0	-1.473	-0.749	-1.52	-2.616	-4.522	-6.03	-7.336	-6.932	-6.473	-5.638	-7.008	-8.326	-7.837	-7.882	-8.05	-8.312	-9.319	-10.221	-11.625
N+30-2-90	2	2024-01-31	2024-02-08	30	30	CAC	12153.9	15.478	0.376246	6.6	21.45	0	4.931	13.004	15.478	14.941	12.728	11.83	9.567	9.117	6.752	4.527	3.156	1.708	0.402	-0.495	-1.087	-2.796	-3.994	-4.555	-4.521
N+30-2-93	4	2024-01-31	2024-02-08	30	30	W	11646	2.102	0.0518398	4.95	4.95	0	1.895	2.102	0.789	-1.825	-3.034	-5.542	-9.096	-11.296	-13.077	-13.453	-13.599	-13.643	-13.904	-14.12	-15.975	-14.875	-14.461	-15.162	-14.18
N+30-2-93	4	2024-01-31	2024-02-08	30	30	CAC	11646	18.641	0.419191	6.6	11.55	0	13.866	18.6	18.641	14.837	9.469	5.88	2.774	-1.046	-4.238	-4.798	-6.825	-8.901	-10.168	-12.196	-14.053	-12.5	-13.2	-13.315	-13.701
N+30-2-97	1	2024-02-01	2024-02-09	30	30	W	11800.1	0	0	1.65	0	0	-0.734	-2.018	-1.967	-2.361	-2.886	-3.46	-3.818	-4.11	-3.981	-4.676	-5.346	-5.376	-4.644	-3.912	-4.412	-4.756	-4.661	-5.083	-4.673
N+30-2-97	1	2024-02-01	2024-02-09	30	30	CAC	11800.1	5.695	0.168322	11.55	18.15	0	1.357	3.193	4.841	4.733	4.585	5.695	4.778	3.536	2.556	1.364	0.496	-0.172	-0.762	-1.452	-2.038	-2.242	-2.598	-2.801	-2.9
N+30-2-98	2	2024-02-01	2024-02-09	30	30	W	11488	0	0	1.65	0	0	-1.149	-0.738	-1.691	-2.55	-3.238	-4.058	-4.73	-5.322	-6.338	-7.234	-7.547	-7.358	-7.453	-7.358	-7.882	-8.119	-8.298	-8.623	-9.087
N+30-2-98	2	2024-02-01	2024-02-09	30	30	CAC	11488	5.409	0.188737	6.6	14.85	0	2.414	5.015	5.409	4.259	4.225	3.46	2.33	1.612	0.868	-0.375	-1.26	-2.233	-2.348	-3.012	-3.44	-3.961	-4.754	-5.351	-5.53
N+30-2-99	3	2024-02-01	2024-02-09	30	30	W	11666.3	0	0	1.65	0	0	-1.281	-1.605	-1.232	-1.354	-2.563	-3.354	-4.125	-4.377	-5.505	-6.775	-8.087	-8.216	-9.133	-8.815	-9.329	-9.036	-8.656	-8.925	-9.431
N+30-2-99	3	2024-02-01	2024-02-09	30	30	CAC	11666.3	10.124	0.384753	8.25	31.35	0	0.118	7.475	9.67	10.124	9.854	9.888	9.854	9.043	8.607	7.392	5.806	3.972	4.055	3.092	2.936	2.623	1.398	0.23	0.144
